# Supplementary material for: High-Power Impulse Magnetron Sputter-Deposited Chromium-Based Coatings for Corrosion Protection
Source: MDPI journal article supplement (doi:10.3390/coatings13122101), 2023-12-18
Supplement: s1 [file s1]

# Supplementary Materials: High-Power Impulse Magnetron Sputter-Deposited Chromium-Based Coatings for Corrosion Protection

Yen-Chun Liu <sup>1</sup>, Shih-Nan Hsiao <sup>2,\*</sup>, Ying-Hung Chen <sup>1,3</sup>, Ping-Yen Hsieh <sup>1,3</sup> and Ju-Liang He <sup>1,3</sup>

<sup>1</sup> Department of Materials Science and Engineering, Feng Chia University, No. 100, Wenhwa Rd., Seatwen District, Taichung City 40724, Taiwan; ycliu@o365.fcu.edu.tw (Y.-C.L.); chenyingh@o365.fcu.edu.tw (Y.-H.C.); pyhsieh@mail.fcu.edu.tw (P.-Y.H.); jlhe@o365.fcu.edu.tw (J.-L.H.)

<sup>2</sup> Center for Low-Temperature plasma Sciences, Nagoya University, Furocho, Chikusaku, Nagoya City 464-0863, Japan

<sup>3</sup> Institute of Plasma, Feng Chia University, No. 100, Wenhwa Road, Seatwen District, Taichung City 407102, Taiwan

\* Correspondence: hsiao@plasma.engg.nagoya-u.ac.jp

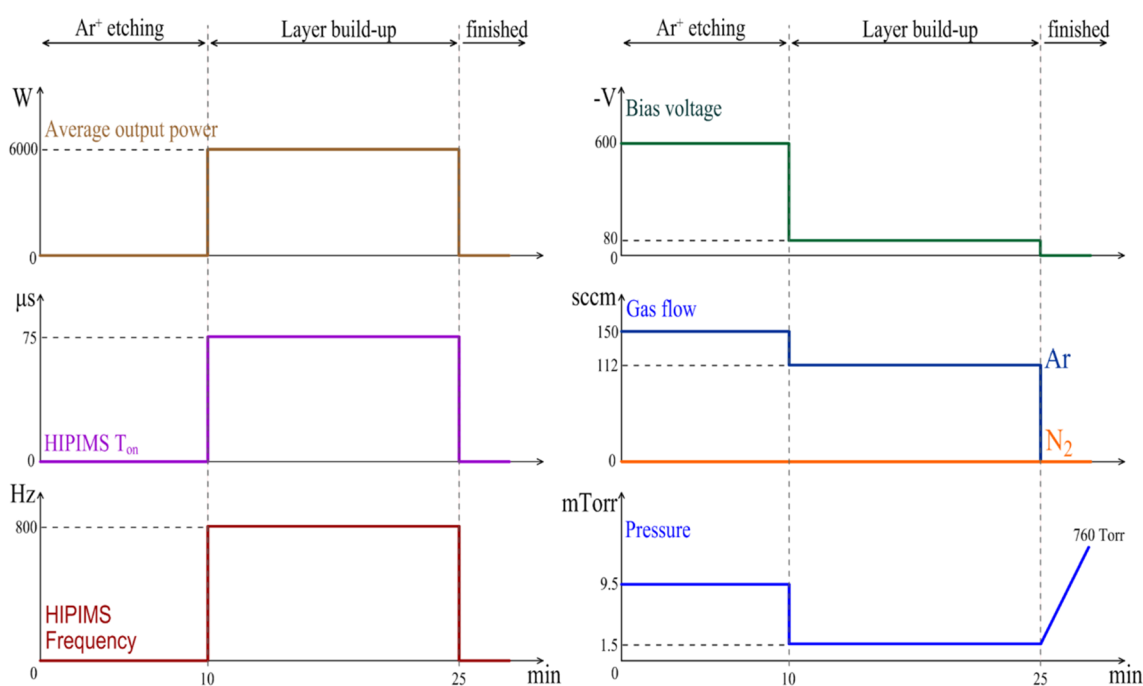

**Figure S1.** Schematic of the parameter setups and variation as a function of deposition time for the Cr single-layer coating (HS1).

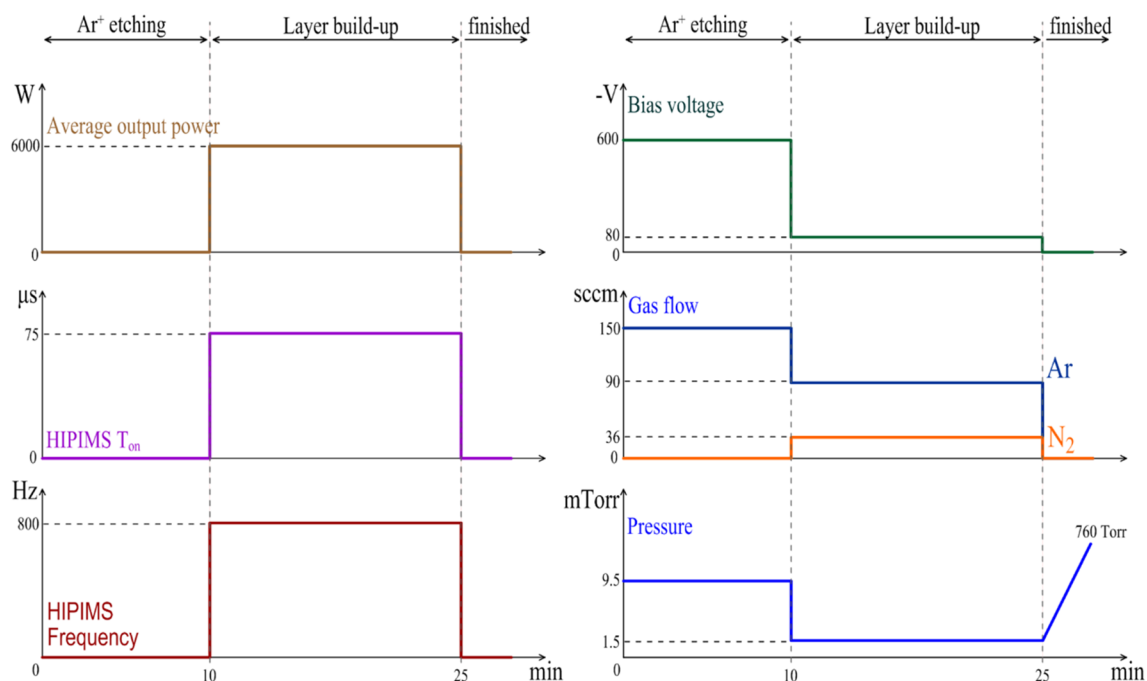

**Figure S2.** Schematic of the parameter setups and variation as a function of deposition time for the CrN single-layer coating (HS2).

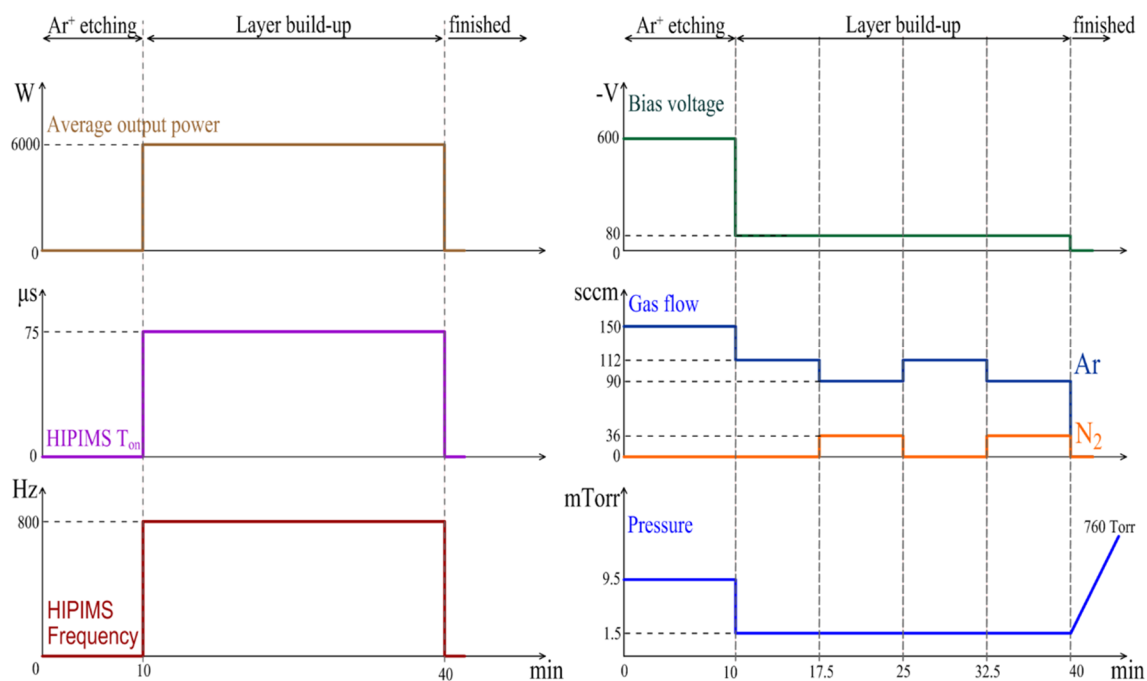

**Figure S3.** Schematic of the parameter setups and variation as a function of deposition time for the multilayer CrN coating (HM1).

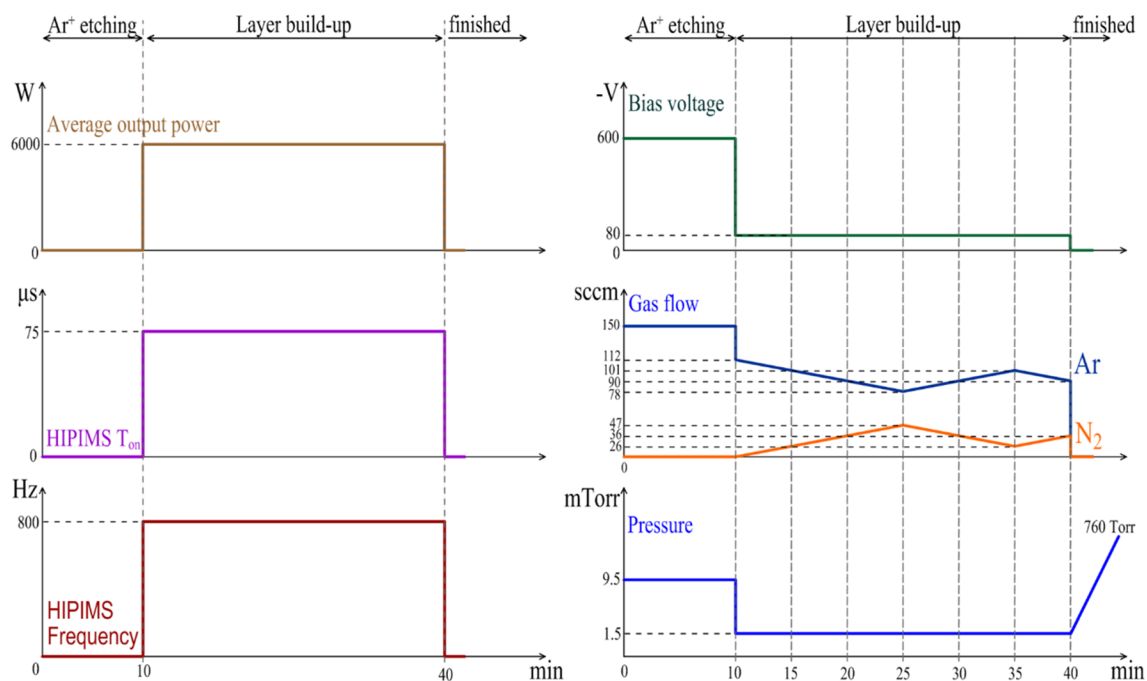

**Figure S4.** Schematic of the parameter setups and variation as a function of deposition time for the multilayer CrN coating (HM2).

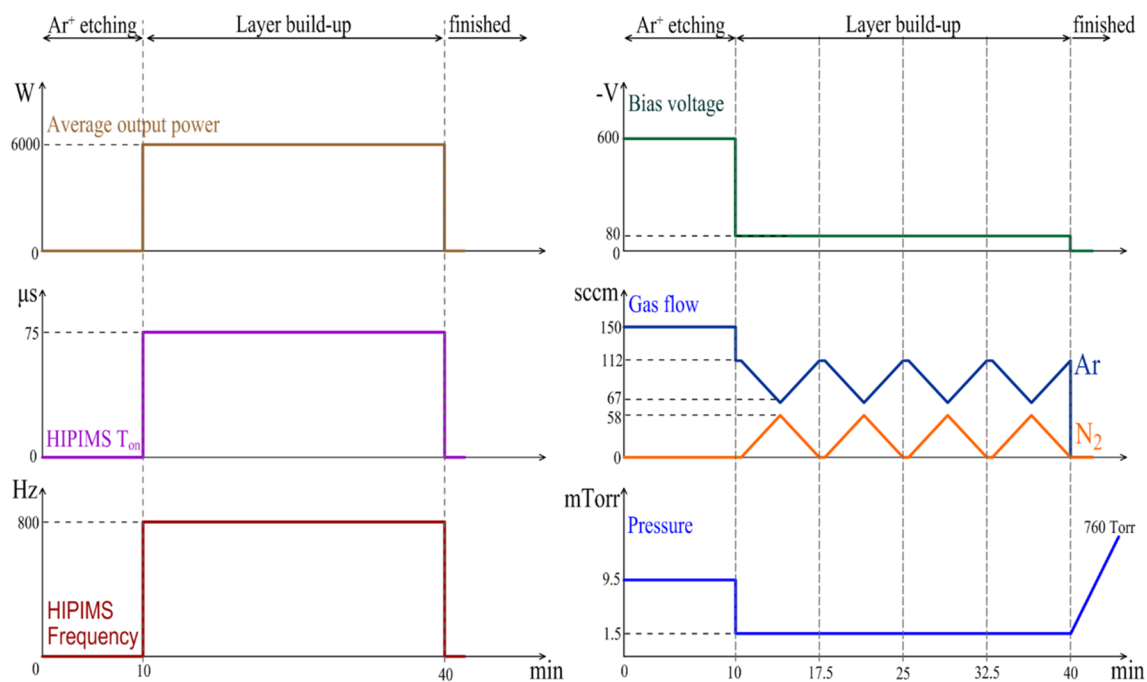

**Figure S5.** Schematic of the parameter setups and variation as a function of deposition time for the multilayer CrN coating (HM3).

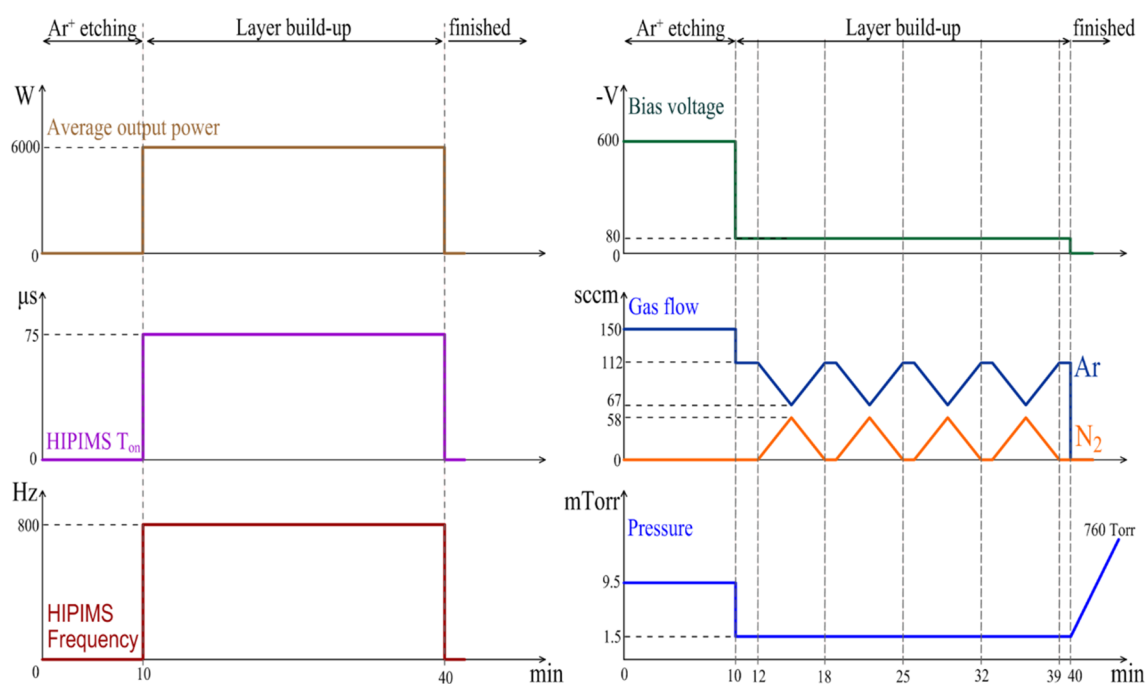

**Figure S6.** Schematic of the parameter setups and variation as a function of deposition time for the multilayer CrN coating (HM4).

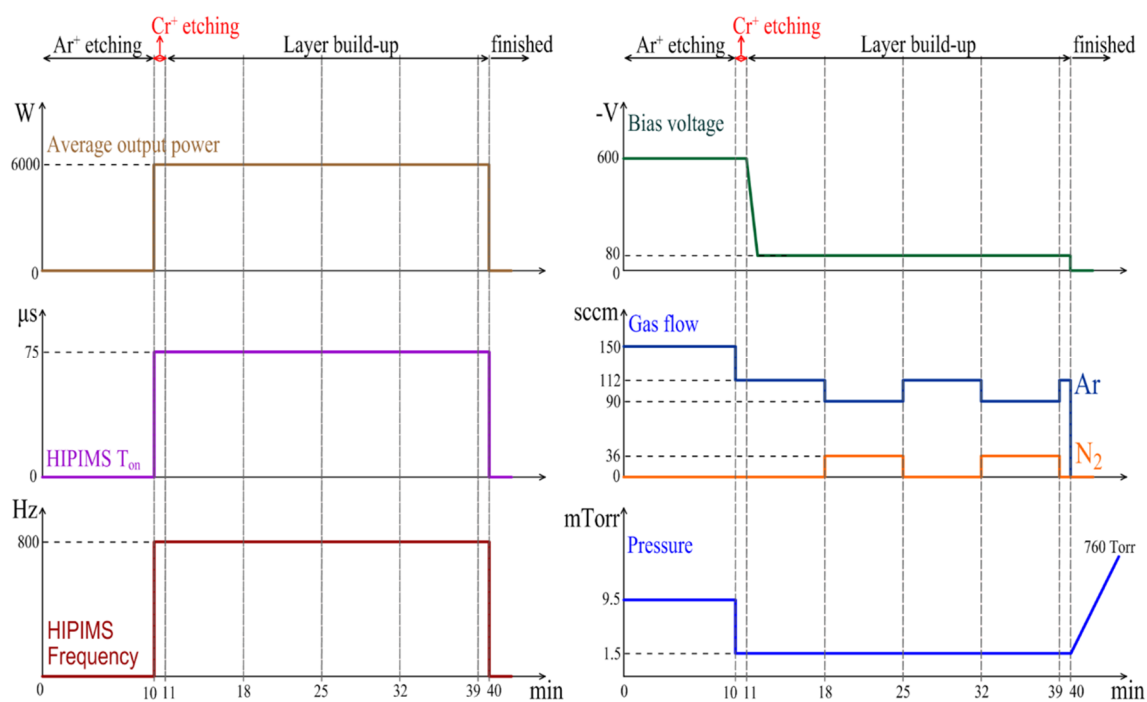

**Figure S7.** Schematic of the parameter setups and variation as a function of deposition time for the multilayer CrN coating (HMS1).

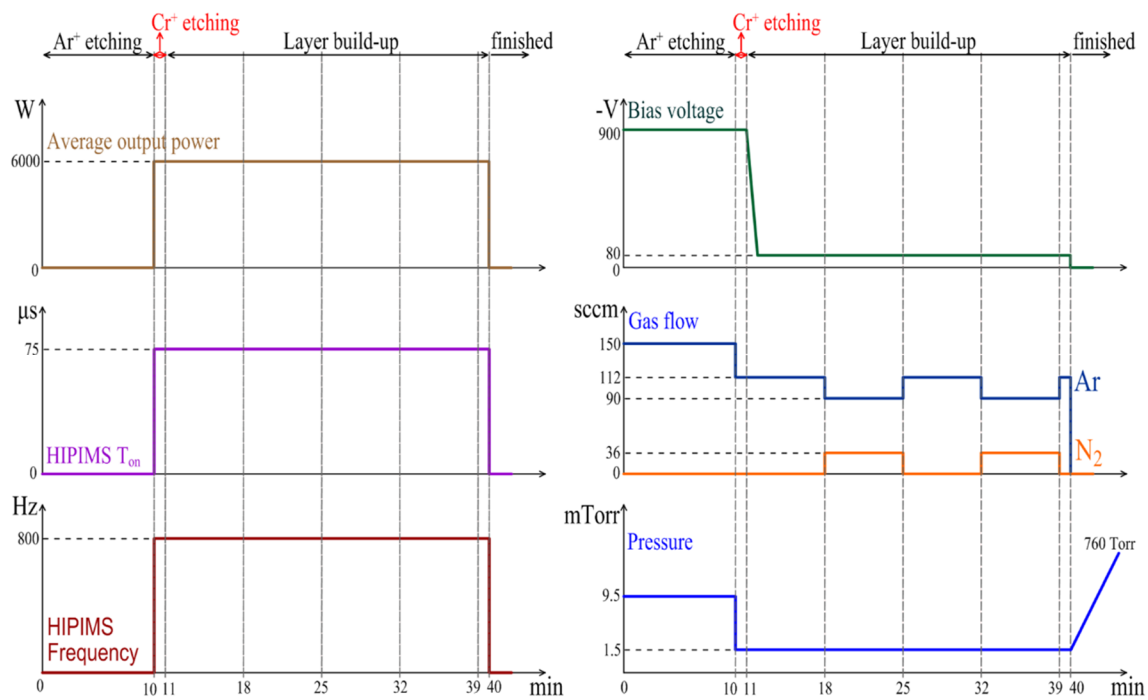

**Figure S8.** Schematic of the parameter setups and variation as a function of deposition time for the multilayer CrN coating (HMS2).
